# Supplementary material for: Social Defeat Modulates T Helper Cell Percentages in Stress Susceptible and Resilient Mice
Source: MDPI journal article supplement (doi:10.3390/ijms20143512), 2019-07-17
Supplement: s1 [file s1]

**Table S2.** Fold change of 84 genes in the mouse cytokine and chemokine RT<sup>2</sup> profiler array normalized to the mean expression of housekeeping genes *Gapdh*, *Gusb* and *Hsp90ab1*.

| Refseq    | Symbol        | Description                                          | Susceptible<br>vs. control<br>fold regulation | p-value <sup>B</sup> | Resilient<br>vs. control<br>fold regulation |
|-----------|---------------|------------------------------------------------------|-----------------------------------------------|----------------------|---------------------------------------------|
| NM_009605 | <i>Adipoq</i> | Adiponectin, C1Q and collagen domain containing      | -2,6964                                       | 0.220                | -7.0969                                     |
| NM_007553 | <i>Bmp2</i>   | Bone morphogenetic protein 2                         | -2,1802                                       | 0.149                | -2.9385                                     |
| NM_007554 | <i>Bmp4</i>   | Bone morphogenetic protein 4                         | -2,4283                                       | 0.111                | -1.5382                                     |
| NM_007556 | <i>Bmp6</i>   | Bone morphogenetic protein 6                         | -1,9336                                       | 0.093                | -1.779                                      |
| NM_007557 | <i>Bmp7</i>   | Bone morphogenetic protein 7                         | -2,4139                                       | 0.060                | -1.8698                                     |
| NM_011329 | <i>Ccl1</i>   | Chemokine (C-C motif) ligand 1                       | -2,2851                                       | 0.241                | -1.2779                                     |
| NM_011330 | <i>Ccl11</i>  | Chemokine (C-C motif) ligand 11                      | 5,6915                                        | 0.374                | 1.147                                       |
| NM_011331 | <i>Ccl12</i>  | Chemokine (C-C motif) ligand 12                      | -2,7573                                       | 0.092                | -2.4954                                     |
| NM_011332 | <i>Ccl17</i>  | Chemokine (C-C motif) ligand 17                      | -2,3891                                       | 0.127                | -1.2329                                     |
| NM_011888 | <i>Ccl19</i>  | Chemokine (C-C motif) ligand 19                      | -2,7219                                       | 0.091                | -1.0386                                     |
| NM_011333 | <i>Ccl2</i>   | Chemokine (C-C motif) ligand 2                       | -3,0426                                       | 0.302                | -4.7352                                     |
| NM_016960 | <i>Ccl20</i>  | Chemokine (C-C motif) ligand 20                      | -1,0439 <sup>A</sup>                          | 0.895                | 1.6497 <sup>A</sup>                         |
| NM_009137 | <i>Ccl22</i>  | Chemokine (C-C motif) ligand 22                      | <b>-3,3055</b>                                | <b>0.013</b>         | -2.6771                                     |
| NM_019577 | <i>Ccl24</i>  | Chemokine (C-C motif) ligand 24                      | -1,5391                                       | 0.224                | -1.2805                                     |
| NM_011337 | <i>Ccl3</i>   | Chemokine (C-C motif) ligand 3                       | <b>-2,0926</b>                                | <b>0.034</b>         | -2.5615                                     |
| NM_013652 | <i>Ccl4</i>   | Chemokine (C-C motif) ligand 4                       | -1,6811                                       | 0.094                | -2.1329                                     |
| NM_013653 | <i>Ccl5</i>   | Chemokine (C-C motif) ligand 5                       | <b>-2,4572</b>                                | <b>0.024</b>         | -2.1169                                     |
| NM_013654 | <i>Ccl7</i>   | Chemokine (C-C motif) ligand 7                       | 1,3437                                        | 0.989                | 1.3493                                      |
| NM_011616 | <i>Cd40lg</i> | CD40 ligand                                          | -2,1442                                       | 0.053                | -1.7667                                     |
| NM_011617 | <i>Cd70</i>   | CD70 antigen                                         | <b>-7,0455</b>                                | <b>0.019</b>         | -1.8189                                     |
| NM_170786 | <i>Cntf</i>   | Ciliary neurotrophic factor                          | -1,2059                                       | 0.841                | 2.0007                                      |
| NM_007778 | <i>Csf1</i>   | Colony stimulating factor 1 (macrophage)             | -2,5178                                       | 0.261                | -1.3083                                     |
| NM_009969 | <i>Csf2</i>   | Colony stimulating factor 2 (granulocyte-macrophage) | -2,2843                                       | 0.230                | -1.3264                                     |
| NM_009971 | <i>Csf3</i>   | Colony stimulating factor 3 (granulocyte)            | 2,5967                                        | 0.099                | 3.9025                                      |
| NM_007795 | <i>Ctf1</i>   | Cardiotrophin 1                                      | 1,0819                                        | 0.790                | 1.6978                                      |
| NM_009142 | <i>Cx3cl1</i> | Chemokine (C-X3-C motif) ligand 1                    | -1,812                                        | 0.553                | -1.0778                                     |
| NM_008176 | <i>Cxcl1</i>  | Chemokine (C-X-C motif) ligand 1                     | -1,5033                                       | 0.068                | -1.7245                                     |
| NM_021274 | <i>Cxcl10</i> | Chemokine (C-X-C motif) ligand 10                    | -2,58                                         | 0.052                | -1.9927                                     |
| NM_019494 | <i>Cxcl11</i> | Chemokine (C-X-C motif) ligand 11                    | <b>-4,8526</b>                                | <b>0.003</b>         | -1.5883                                     |
| NM_021704 | <i>Cxcl12</i> | Chemokine (C-X-C motif) ligand 12                    | -1,829                                        | 0.082                | -1.5104                                     |
| NM_018866 | <i>Cxcl13</i> | Chemokine (C-X-C motif) ligand 13                    | -2,4888                                       | 0.075                | -1.6641                                     |
| NM_023158 | <i>Cxcl16</i> | Chemokine (C-X-C motif) ligand 16                    | -3,7689                                       | 0.069                | -1.7893                                     |
| NM_203320 | <i>Cxcl3</i>  | Chemokine (C-X-C motif) ligand 3                     | 1,6266                                        | 0.903                | -1.0923                                     |
| NM_009141 | <i>Cxcl5</i>  | Chemokine (C-X-C motif) ligand 5                     | 1,285                                         | 0.717                | -1.0211                                     |
| NM_008599 | <i>Cxcl9</i>  | Chemokine (C-X-C motif) ligand 9                     | -1,4589                                       | 0.264                | -1.3553                                     |
| NM_010177 | <i>Fasl</i>   | Fas ligand (TNF superfamily, member 6)               | 1,0862                                        | 0.958                | 1.4083                                      |
| NM_008155 | <i>Gpi1</i>   | Glucose phosphate isomerase 1                        | -1,5124                                       | 0.129                | -1.5801                                     |
| NM_010406 | <i>Hc</i>     | Hemolytic complement                                 | -4,3546                                       | 0.090                | -2.5876                                     |

**Table S2 continued**

| Refseq       | Symbol           | Description                                                              | Susceptible<br>vs. control<br>fold regulation | p-value <sup>B</sup> | Resilient<br>vs. control<br>fold regulation |
|--------------|------------------|--------------------------------------------------------------------------|-----------------------------------------------|----------------------|---------------------------------------------|
| NM_010503    | <i>Ifna2</i>     | Interferon alpha 2                                                       | -1,0439 <sup>A</sup>                          | 0.895                | 1.6497 <sup>A</sup>                         |
| NM_008337    | <i>Ifng</i>      | Interferon gamma                                                         | -1,9443                                       | 0.078                | -3.2882                                     |
| NM_010548    | <i>Il10</i>      | Interleukin 10                                                           | -1,3453                                       | 0.390                | -4.4725                                     |
| NM_008350    | <i>Il11</i>      | Interleukin 11                                                           | -1,9218                                       | 0.173                | -1.6709                                     |
| NM_008351    | <i>Il12a</i>     | Interleukin 12A                                                          | <b>-2,7967</b>                                | <b>0.014</b>         | -2.5416                                     |
| NM_008352    | <i>Il12b</i>     | Interleukin 12B                                                          | -2,0722                                       | 0.064                | -2.4733                                     |
| NM_008355    | <i>Il13</i>      | Interleukin 13                                                           | -1,5366                                       | 0.190                | -2.3091                                     |
| NM_008357    | <i>Il15</i>      | Interleukin 15                                                           | -1,921                                        | 0.053                | -2.037                                      |
| NM_010551    | <i>Il16</i>      | Interleukin 16                                                           | -1,9137                                       | 0.291                | -2.3293                                     |
| NM_010552    | <i>Il17a</i>     | Interleukin 17A                                                          | -1,0439 <sup>A</sup>                          | 0.895                | 1.6497 <sup>A</sup>                         |
| NM_145856    | <i>Il17f</i>     | Interleukin 17F                                                          | 1,923                                         | 0.231                | 3.9549                                      |
| NM_008360    | <i>Il18</i>      | Interleukin 18                                                           | <b>-1,5194</b>                                | <b>0.026</b>         | -1.7192                                     |
| NM_010554    | <i>Il1a</i>      | Interleukin 1 alpha                                                      | -1,2444                                       | 0.755                | -1.1079                                     |
| NM_008361    | <i>Il1b</i>      | Interleukin 1 beta                                                       | 1,1195                                        | 0.980                | -1.543                                      |
| NM_031167    | <i>Il1rn</i>     | Interleukin 1 receptor antagonist                                        | -1,4635                                       | 0.180                | -1.9358                                     |
| NM_008366    | <i>Il2</i>       | Interleukin 2                                                            | -1,4114                                       | 0.397                | -1.2369                                     |
| NM_021782    | <i>Il21</i>      | Interleukin 21                                                           | -1,2495                                       | 0.782                | -2.5174                                     |
| NM_016971    | <i>Il22</i>      | Interleukin 22                                                           | 1,1468                                        | 0.567                | 2.1213                                      |
| NM_031252    | <i>Il23a</i>     | Interleukin 23, alpha subunit p19                                        | 1,0946                                        | 0.857                | 1.2384                                      |
| NM_053095    | <i>Il24</i>      | Interleukin 24                                                           | -3,5384                                       | 0.124                | -2.3583                                     |
| NM_145636    | <i>Il27</i>      | Interleukin 27                                                           | <b>-2,972</b>                                 | <b>0.005</b>         | -2.3616                                     |
| NM_010556    | <i>Il3</i>       | Interleukin 3                                                            | -1,4952                                       | 0.835                | 2.3884                                      |
| NM_021283    | <i>Il4</i>       | Interleukin 4                                                            | -2,0652                                       | 0.114                | -1.4104                                     |
| NM_010558    | <i>Il5</i>       | Interleukin 5                                                            | -4,2424                                       | 0.053                | -1.3287                                     |
| NM_031168    | <i>Il6</i>       | Interleukin 6                                                            | 1,3978                                        | 0.415                | -1.6182                                     |
| NM_008371    | <i>Il7</i>       | Interleukin 7                                                            | <b>-2,8708</b>                                | <b>0.001</b>         | -1.8265                                     |
| NM_008373    | <i>Il9</i>       | Interleukin 9                                                            | -1,0439 <sup>A</sup>                          | 0.895                | 1.6497 <sup>A</sup>                         |
| NM_008501    | <i>Lif</i>       | Leukemia inhibitory factor                                               | <b>-1,6974</b>                                | <b>0.007</b>         | -1.7968                                     |
| NM_010735    | <i>Lta</i>       | Lymphotoxin A                                                            | <b>-3,861</b>                                 | <b>0.019</b>         | -2.0008                                     |
| NM_008518    | <i>Ltb</i>       | Lymphotoxin B                                                            | <b>-2,9926</b>                                | <b>0.018</b>         | -1.9319                                     |
| NM_010798    | <i>Mif</i>       | Macrophage migration inhibitory factor                                   | 1,3147                                        | 0.338                | -2.603                                      |
| NM_010834    | <i>Mstn</i>      | Myostatin                                                                | -1,0439 <sup>A</sup>                          | 0.895                | 1.6497 <sup>A</sup>                         |
| NM_013611    | <i>Nodal</i>     | Nodal                                                                    | -1,2466                                       | 0.634                | 1.1199                                      |
| NM_001013365 | <i>Osm</i>       | Oncostatin M                                                             | -1,067                                        | 0.837                | -1.9452                                     |
| NM_019932    | <i>Pf4</i>       | Platelet factor 4                                                        | 1,0582                                        | 0.740                | -1.0346                                     |
| NM_023785    | <i>Pbbp</i>      | Pro-platelet basic protein                                               | 1,0016                                        | 0.770                | 1.0861                                      |
| NM_009263    | <i>Spp1</i>      | Secreted phosphoprotein 1                                                | <b>-1,6097</b>                                | <b>0.023</b>         | -1.8453                                     |
| NM_009367    | <i>Tgfb2</i>     | Transforming growth factor, beta 2                                       | -1,378                                        | 0.144                | 1.0267                                      |
| NM_009379    | <i>Thpo</i>      | Thrombopoietin                                                           | -1,1805                                       | 0.700                | -1.8442                                     |
| NM_013693    | <i>Tnf</i>       | Tumor necrosis factor                                                    | <b>-3,5215</b>                                | <b>0.010</b>         | -2.2974                                     |
| NM_008764    | <i>Tnfrsf11b</i> | Tumor necrosis factor receptor superfamily, member 11b (osteoprotegerin) | <b>-3,5001</b>                                | <b>0.035</b>         | -1.3698                                     |

**Table S2 continued**

| Refseq    | Symbol          | Description                                               | Susceptible<br>vs. control<br>fold regulation | p-value <sup>B</sup> | Resilient<br>vs. control<br>fold regulation |
|-----------|-----------------|-----------------------------------------------------------|-----------------------------------------------|----------------------|---------------------------------------------|
| NM_009425 | <i>Tnfsf10</i>  | Tumor necrosis factor (ligand)<br>superfamily, member 10  | -1,6369                                       | 0.349                | 1.0805                                      |
| NM_011613 | <i>Tnfsf11</i>  | Tumor necrosis factor (ligand)<br>superfamily, member 11  | -2,0835                                       | 0.243                | -2.6957                                     |
| NM_033622 | <i>Tnfsf13b</i> | Tumor necrosis factor (ligand)<br>superfamily, member 13b | -1,8146                                       | 0.263                | 1.2428                                      |
| NM_009505 | <i>Vegfa</i>    | Vascular endothelial growth factor A                      | <b>-2,0575</b>                                | <b>0.002</b>         | -6.3409                                     |
| NM_008510 | <i>Xcl1</i>     | Chemokine (C motif) ligand 1                              | <b>-2,1714</b>                                | <b>0.008</b>         | -2.5541                                     |

A: This gene's average threshold cycle is either not determined or greater than the defined cut-off (35 Ct), in both samples meaning that its expression was undetected, making this fold-change result erroneous and uninterpretable.

B: p-value from t-test between control (n = 3) and susceptible (n = 3) samples. For resilient mice (n = 2) statistics could not be calculated due to low sample size.
