# Supplementary material for: Social Defeat Modulates T Helper Cell Percentages in Stress Susceptible and Resilient Mice
Source: MDPI journal article supplement (doi:10.3390/ijms20143512), 2019-07-17
Supplement: s1 [file s1]

**Table S3.** Overview of cohorts and sample sizes for flow cytometry experiments. C: control, S: susceptible, R: resilient.

| Spleen cells<br>unstimulated* | Sample size behavior |    |    | Parameters flow cytometry   | Sample size flow<br>cytometry |    |    |
|-------------------------------|----------------------|----|----|-----------------------------|-------------------------------|----|----|
|                               | C                    | S  | R  |                             | C                             | S  | R  |
| Cohort 1                      | 5                    | 5  | 2  |                             | _a                            | _a | _a |
| Cohort 2                      | 5                    | 6  | 4  | TCR, CD4, CD8, IFNg, IL-17A | 5                             | 6  | 4  |
| Cohort 3                      | 5                    | 5  | 5  | TCR, CD4, CD8, IFNg, IL-17A | 5                             | 5  | 5  |
| Total                         | 15                   | 16 | 11 |                             | 10                            | 11 | 9  |

  

| PMA/Iono<br>stimulated<br>spleen cells* | Sample size behavior |    |    | Parameters flow cytometry   | Sample size flow<br>cytometry |    |    |
|-----------------------------------------|----------------------|----|----|-----------------------------|-------------------------------|----|----|
|                                         | C                    | S  | R  |                             | C                             | S  | R  |
| Cohort 1                                | 5                    | 5  | 2  |                             | _b                            | _b | _b |
| Cohort 2                                | 5                    | 6  | 4  | TCR, CD4, CD8, IFNg, IL-17A | 4 <sup>c</sup>                | 6  | 4  |
| Cohort 3                                | 5                    | 5  | 5  | TCR, CD4, CD8, IFNg, IL-17A | 5                             | 5  | 5  |
| Total                                   | 26                   | 26 | 21 |                             | 9                             | 11 | 9  |

  

| Intranuclear<br>FoxP3 stained<br>spleen cells* | Sample size behavior |    |    | Parameters flow cytometry | Sample size flow<br>cytometry |    |    |
|------------------------------------------------|----------------------|----|----|---------------------------|-------------------------------|----|----|
|                                                | C                    | S  | R  |                           | C                             | S  | R  |
| Cohort 1                                       | 5                    | 5  | 2  | TCR, CD4, CD25, FoxP3     | 5                             | 5  | 2  |
| Cohort 2                                       | 5                    | 6  | 4  | TCR, CD4, CD25, FoxP3     | 5                             | 6  | 4  |
| Cohort 3                                       | 5                    | 5  | 5  | TCR, CD4, CD25, FoxP3     | 5                             | 5  | 5  |
| Total                                          | 15                   | 16 | 11 |                           | 15                            | 16 | 11 |

\* Same animals were used for the indicated flow cytometric analyses. <sup>a</sup> Unstimulated spleen cells were not investigated in this cohort. <sup>b</sup> PMA/Iono stimulated spleen cells were not investigated in this cohort. <sup>c</sup> One sample had not been stimulated with PMA/Iono.
