# Supplementary material for: Social Defeat Modulates T Helper Cell Percentages in Stress Susceptible and Resilient Mice
Source: MDPI journal article supplement (doi:10.3390/ijms20143512), 2019-07-17
Supplement: s1 [file s1]

**Table S1.** Overview of the statistical data for all analyzed parameters in socially defeated C57BL/6J mice. C: control, S: susceptible, R: resilient.

| Parameter                                             | mean $\pm$ SEM    |                   |                  | ANCOVA           |                     | Bonferroni posthoc  |                     |                     |
|-------------------------------------------------------|-------------------|-------------------|------------------|------------------|---------------------|---------------------|---------------------|---------------------|
|                                                       | C                 | S                 | R                |                  |                     | C vs. S             | C vs. R             | S vs. R             |
| Social interaction test                               |                   |                   |                  |                  |                     |                     |                     |                     |
| n                                                     | 15                | 16                | 11               |                  |                     |                     |                     |                     |
| Interaction ratio                                     | 1.19 $\pm$ 0.07   | 0.17 $\pm$ 0.03   | 1.14 $\pm$ 0.17  | F(2,39) = 41.70  | <b>p &lt; 0.001</b> | <b>p &lt; 0.001</b> | p > 0.999           | <b>p &lt; 0.001</b> |
| Interaction time (s)                                  | 100.43 $\pm$ 3.95 | 15.53 $\pm$ 3.72  | 85.85 $\pm$ 7.03 | F(2,39) = 101.67 | <b>p &lt; 0.001</b> | <b>p &lt; 0.001</b> | p = 0.129           | <b>p &lt; 0.001</b> |
| Corner time (s)                                       | 8.58 $\pm$ 1.03   | 67.93 $\pm$ 10.62 | 17.87 $\pm$ 3.50 | F(2,39) = 21.09  | <b>p &lt; 0.001</b> | <b>p &lt; 0.001</b> | p > 0.999           | <b>p &lt; 0.001</b> |
| Taqman gene expression analysis                       |                   |                   |                  |                  |                     |                     |                     |                     |
| n                                                     | 6                 | 6                 | 4                |                  |                     |                     |                     |                     |
| <i>Csf2</i>                                           | 1.00 $\pm$ 0.15   | 0.37 $\pm$ 0.05   | 0.50 $\pm$ 0.09  | F(2,13) = 10.10  | <b>p = 0.002</b>    | <b>p = 0.003</b>    | <b>p = 0.026</b>    | p > 0.999           |
| <i>Il12a</i>                                          | 1.00 $\pm$ 0.09   | 0.30 $\pm$ 0.06   | 0.50 $\pm$ 0.12  | F(2,13) = 19.51  | <b>p &lt; 0.001</b> | <b>p &lt; 0.001</b> | <b>p = 0.006</b>    | p = 0.424           |
| <i>Ifng</i>                                           | 1.00 $\pm$ 0.03   | 0.36 $\pm$ 0.04   | 0.53 $\pm$ 0.13  | F(2,13) = 29.10  | <b>p &lt; 0.001</b> | <b>p &lt; 0.001</b> | <b>p = 0.001</b>    | p = 0.307           |
| <i>Il27</i>                                           | 1.00 $\pm$ 0.12   | 0.37 $\pm$ 0.04   | 0.44 $\pm$ 0.08  | F(2,13) = 15.57  | <b>p &lt; 0.001</b> | <b>p = 0.001</b>    | <b>p = 0.003</b>    | p > 0.999           |
| <i>Il17f</i>                                          | 1.00 $\pm$ 0.14   | 2.56 $\pm$ 0.49   | 2.22 $\pm$ 0.78  | F(2,13) = 3.36   | p = 0.067           |                     |                     |                     |
| <i>Tgfb2</i>                                          | 1.00 $\pm$ 0.06   | 0.45 $\pm$ 0.05   | 0.76 $\pm$ 0.13  | F(2,13) = 14.78  | <b>p &lt; 0.001</b> | <b>p &lt; 0.001</b> | p = 0.155           | p = 0.053           |
| n                                                     | 15                | 16                | 11               |                  |                     |                     |                     |                     |
| Absolute spleen cell number ( $\times 10^7$ )         | 3.85 $\pm$ 0.82   | 12.06 $\pm$ 3.79  | 9.36 $\pm$ 3.37  | F(2,37) = 4.40   | <b>p = 0.019</b>    | <b>p = 0.019</b>    | p = 0.182           | p > 0.999           |
| Spleen cells unstimulated                             |                   |                   |                  |                  |                     |                     |                     |                     |
| n                                                     | 10                | 11                | 9                |                  |                     |                     |                     |                     |
| % TCR <sup>+</sup>                                    | 26.24 $\pm$ 0.72  | 13.25 $\pm$ 1.67  | 14.02 $\pm$ 1.84 | F(2,26) = 27.11  | <b>p &lt; 0.001</b> | <b>p &lt; 0.001</b> | <b>p &lt; 0.001</b> | p > 0.999           |
| # TCR <sup>+</sup> ( $\times 10^7$ )                  | 1.07 $\pm$ 0.34   | 1.86 $\pm$ 0.56   | 1.71 $\pm$ 0.74  | F(2,26) = 2.74   | p = 0.083           |                     |                     |                     |
| % CD4 <sup>+</sup> (TCR <sup>+</sup> pregate)         | 58.88 $\pm$ 2.46  | 59.90 $\pm$ 2.33  | 55.86 $\pm$ 3.10 | F(2,26) = 0.61   | p = 0.551           |                     |                     |                     |
| # CD4 <sup>+</sup> TCR <sup>+</sup> ( $\times 10^7$ ) | 0.67 $\pm$ 0.22   | 1.22 $\pm$ 0.38   | 1.06 $\pm$ 0.46  | F(2,26) = 2.61   | p = 0.092           |                     |                     |                     |
| % CD8 <sup>+</sup> (TCR <sup>+</sup> pregate)         | 36.16 $\pm$ 1.36  | 40.27 $\pm$ 1.35  | 36.79 $\pm$ 1.49 | F(2,26) = 2.54   | p = 0.099           |                     |                     |                     |
| # CD8 <sup>+</sup> TCR <sup>+</sup> ( $\times 10^6$ ) | 3.66 $\pm$ 1.16   | 7.70 $\pm$ 2.35   | 6.23 $\pm$ 2.69  | F(2,26) = 3.59   | <b>p = 0.042</b>    | p = 0.062           | p = 0.128           | p > 0.999           |

**Table S1 continued**

| Parameter                                                                                                 | mean ± SEM   |              |              | ANCOVA          |                     | Bonferroni posthoc  |                  |           |
|-----------------------------------------------------------------------------------------------------------|--------------|--------------|--------------|-----------------|---------------------|---------------------|------------------|-----------|
|                                                                                                           | C            | S            | R            |                 |                     | C vs. S             | C vs. R          | S vs. R   |
| PMA/Iono stimulated spleen cells                                                                          |              |              |              |                 |                     |                     |                  |           |
| n                                                                                                         | 9            | 11           | 9            |                 |                     |                     |                  |           |
| % IFN- $\gamma$ <sup>+</sup> IL-17A <sup>-</sup> (CD4 <sup>+</sup> TCR <sup>+</sup> pregate)              | 1.49 ± 0.27  | 0.71 ± 0.13  | 1.30 ± 0.30  | F(2,25) = 4.82  | <b>p = 0.017</b>    | <b>p = 0.019</b>    | p > 0.999        | p = 0.129 |
| # IFN- $\gamma$ <sup>+</sup> IL-17A <sup>-</sup> CD4 <sup>+</sup> TCR <sup>+</sup> (x 10 <sup>4</sup> )   | 5.55 ± 2.17  | 5.40 ± 1.77  | 5.71 ± 2.35  | F(2,25) = 0.69  | p = 0.511           |                     |                  |           |
| % IL-17A <sup>+</sup> IFN- $\gamma$ <sup>-</sup> (CD4 <sup>+</sup> TCR <sup>+</sup> pregate)              | 1.30 ± 0.50  | 5.73 ± 1.78  | 3.57 ± 1.45  | F(2,25) = 6.05  | <b>p = 0.007</b>    | <b>p = 0.006</b>    | p = 0.157        | p = 0.578 |
| # IL-17A <sup>+</sup> IFN- $\gamma$ <sup>-</sup> CD4 <sup>+</sup> TCR <sup>+</sup> (x 10 <sup>6</sup> )   | 0.19 ± 0.08  | 1.31 ± 0.47  | 0.85 ± 0.36  | F(2,25) = 3.89  | <b>p = 0.034</b>    | <b>p = 0.032</b>    | p = 0.242        | p > 0.999 |
| % IFN- $\gamma$ <sup>+</sup> IL-17A <sup>+</sup> (CD4 <sup>+</sup> TCR <sup>+</sup> pregate)              | 0.03 ± 0.01  | 0.01 ± 0.01  | 0.04 ± 0.02  | F(2,25) = 1.78  | p = 0.189           |                     |                  |           |
| # IFN- $\gamma$ <sup>+</sup> IL-17A <sup>+</sup> CD4 <sup>+</sup> TCR <sup>+</sup> (x 10 <sup>3</sup> )   | 3.32 ± 1.54  | 2.51 ± 1.51  | 10.16 ± 6.95 | F(2,25) = 1.68  | p = 0.207           |                     |                  |           |
| % IL-17A <sup>+</sup> IFN- $\gamma$ <sup>+/-</sup> (CD4 <sup>+</sup> TCR <sup>+</sup> pregate)            | 1.32 ± 0.51  | 5.74 ± 1.78  | 3.61 ± 1.46  | F(2,25) = 7.58  | <b>p = 0.003</b>    | <b>p = 0.002</b>    | p = 0.075        | p = 0.603 |
| # IL-17A <sup>+</sup> IFN- $\gamma$ <sup>+/-</sup> CD4 <sup>+</sup> TCR <sup>+</sup> (x 10 <sup>6</sup> ) | 0.19 ± 0.08  | 1.32 ± 0.47  | 0.86 ± 0.36  | F(2,25) = 4.90  | <b>p = 0.016</b>    | <b>p = 0.015</b>    | p = 0.141        | p > 0.999 |
| % IFN- $\gamma$ <sup>+</sup> IL-17A <sup>-</sup> (CD8 <sup>+</sup> TCR <sup>+</sup> pregate)              | 2.19 ± 0.72  | 1.27 ± 0.46  | 3.36 ± 1.11  | F(2,25) = 2.95  | p = 0.071           |                     |                  |           |
| # IFN- $\gamma$ <sup>+</sup> IL-17A <sup>-</sup> CD8 <sup>+</sup> TCR <sup>+</sup> (x 10 <sup>4</sup> )   | 2.56 ± 0.85  | 2.82 ± 0.91  | 3.78 ± 1.14  | F(2,25) = 1.68  | p = 0.206           |                     |                  |           |
| % IL-17A <sup>+</sup> (CD8 <sup>+</sup> TCR <sup>+</sup> pregate)                                         | 1.93 ± 0.75  | 6.61 ± 2.00  | 4.56 ± 1.77  | F(2,25) = 6.01  | <b>p = 0.007</b>    | <b>p = 0.006</b>    | p = 0.097        | p = 0.911 |
| # IL-17A <sup>+</sup> CD8 <sup>+</sup> TCR <sup>+</sup> (x 10 <sup>6</sup> )                              | 0.19 ± 0.08  | 1.27 ± 0.46  | 0.80 ± 0.34  | F(2,25) = 3.75  | <b>p = 0.038</b>    | <b>p = 0.036</b>    | p = 0.289        | p > 0.999 |
| % IFN- $\gamma$ <sup>+</sup> IL-17A <sup>+</sup> (CD8 <sup>+</sup> TCR <sup>+</sup> pregate)              | 0.02 ± 0.01  | 0.01 ± 0.004 | 0.03 ± 0.01  | F(2,25) = 1.93  | p = 0.166           |                     |                  |           |
| # IFN- $\gamma$ <sup>+</sup> IL-17A <sup>+</sup> CD8 <sup>+</sup> TCR <sup>+</sup> (x 10 <sup>3</sup> )   | 1.09 ± 0.73  | 1.05 ± 0.68  | 3.63 ± 2.39  | F(2,25) = 1.58  | p = 0.227           |                     |                  |           |
| Intranuclear FoxP3 stained spleen cells                                                                   |              |              |              |                 |                     |                     |                  |           |
| n                                                                                                         | 15           | 16           | 11           |                 |                     |                     |                  |           |
| % TCR <sup>+</sup>                                                                                        | 30.53 ± 3.40 | 13.33 ± 2.11 | 13.67 ± 2.12 | F(2,37) = 14.57 | <b>p &lt; 0.001</b> | <b>p &lt; 0.001</b> | <b>p = 0.001</b> | p > 0.999 |
| # TCR <sup>+</sup> (x 10 <sup>7</sup> )                                                                   | 1.51 ± 0.41  | 0.88 ± 0.21  | 1.15 ± 0.43  | F(2,37) = 3.21  | p = 0.052           |                     |                  |           |
| % CD4 <sup>+</sup> (TCR <sup>+</sup> pregate)                                                             | 50.75 ± 2.52 | 45.08 ± 3.09 | 40.08 ± 3.09 | F(2,37) = 4.78  | <b>p = 0.014</b>    | p = 0.163           | <b>p = 0.014</b> | p = 0.655 |
| # CD4 <sup>+</sup> TCR <sup>+</sup> (x 10 <sup>6</sup> )                                                  | 7.29 ± 1.88  | 3.68 ± 0.80  | 4.10 ± 1.37  | F(2,37) = 4.62  | <b>p = 0.016</b>    | <b>p = 0.014</b>    | p = 0.230        | p > 0.999 |
| % CD25 <sup>+</sup> (CD4 <sup>+</sup> TCR <sup>+</sup> pregate)                                           | 8.06 ± 0.32  | 9.75 ± 0.95  | 10.09 ± 1.38 | F(2,37) = 1.58  | p = 0.221           |                     |                  |           |
| # CD25 <sup>+</sup> CD4 <sup>+</sup> TCR <sup>+</sup> (x 10 <sup>5</sup> )                                | 6.25 ± 1.58  | 3.20 ± 0.67  | 4.08 ± 1.38  | F(2,37) = 6.39  | <b>p = 0.004</b>    | <b>p = 0.003</b>    | p = 0.272        | p = 0.434 |

**Table S1 continued**

| Parameter                                                                   | mean $\pm$ SEM  |                 |                 | ANCOVA         |                  | Bonferroni posthoc |           |           |
|-----------------------------------------------------------------------------|-----------------|-----------------|-----------------|----------------|------------------|--------------------|-----------|-----------|
|                                                                             | C               | S               | R               |                |                  | C vs. S            | C vs. R   | S vs. R   |
| % FoxP3 <sup>+</sup> (CD4 <sup>+</sup> TCR <sup>+</sup> pregate)            | 1.17 $\pm$ 0.11 | 0.98 $\pm$ 0.19 | 1.32 $\pm$ 0.34 | F(2,37) = 0.45 | p = 0.643        |                    |           |           |
| # FoxP3 <sup>+</sup> CD4 <sup>+</sup> TCR <sup>+</sup> (x 10 <sup>4</sup> ) | 7.86 $\pm$ 2.26 | 3.05 $\pm$ 0.75 | 3.22 $\pm$ 1.05 | F(2,37) = 5.56 | <b>p = 0.008</b> | <b>p = 0.009</b>   | p = 0.070 | p = 0.655 |
