# Supplementary material for: Social Defeat Modulates T Helper Cell Percentages in Stress Susceptible and Resilient Mice
Source: Int J Mol Sci. 2019 Jul 17;20(14):3512. doi: 10.3390/ijms20143512 (PMC6678569; doi:10.3390/ijms20143512)
Supplement: Supplementary file 1 [file ijms-20-03512-s001.zip]

Archive with 4 entries (4 files):
- Supplementary_Figure_1.pdf
- Supplementary_Table_1.pdf
- Supplementary_Table_2.pdf
- Supplementary_Table_3.pdf
